# Supplementary material for: The Reported Use of Nosebands in Racing and Equestrian Pursuits
Source: MDPI journal article supplement (doi:10.3390/ani10050776), 2020-04-30
Supplement: s1 [file s1]

A transcript of Weller et al.'s 2019-2020 survey. Questions have been highlighted in **bold**. Numbers next to options (e.g. 1 next to racing or 16 next to dressage in the first question) are how RedCAP tracks which answers are given.

**Which option best describes your primary activity with horses**

- 1, Racing
- 15, Camp-drafting/Cutting/Team penning/Working cow horse
- 16, Dressage
- 17, Driving
- 18, Endurance
- 19, Eventing
- 20, Mounted games/Horseball
- 21, Mustering/farm work
- 22, Natural Horsemanship
- 23, Polo/Polocrosse
- 24, Pony Club/Adult riding club/ Working Equitation
- 25, Show-jumping
- 26, Showing/hacking
- 27, Trail-riding/Pleasure riding
- 28, Western pleasure/ Western Dressage/ Reining/ Barrel racing
- 30, Pleasure/fun
- 29, Other

**(Other) Please describe your primary**

**How many horses do you work with?**

**What is the main breed of horse that you work with currently?**

- 1, Standardbred
- 2, Thoroughbred
- 3, American Saddlebred
- 4, Andalusian/PRE/ Lusitano/Iberian
- 5, Appaloosa

6, Arabian & Arabian Derivative

7, Australian Riding Pony

8, Australian Stock Horse

9, Brumby

10, Cleveland Bay

11, Clydesdale

12, Cob

13, Coloured Breed

14, Connemara

15, Cross Breed

16, Donkey/Mule

17, Friesian

18, Gypsy Cob

19, Haflinger

20, Irish Draught

21, Irish Sport Horse

22, Lipizzaner

23, Miniature Horse/Pony

24, Morgan

25, Paint

26, Palouse

27, Percheron

28, Peruvian Paso

29, Pinto

30, Pony

31, Quarter Horse

32, Riding Pony

33, Shetland

34, Shire

35, Waler

36, Warmblood

37, Welsh

38, Other

(Other) If the main breed of horses you have in training is NOT in the list above, please specify here.

Do you train/race any of your horses while wearing nosebands?

- 1, Always
- 2, Usually
- 3, Sometimes
- 4, Rarely
- 5, Never

If not always, why not?

- 1, No Need
- 2, Not allowed in the rules of the sport
- 3, I want my horses to be able to open their mouths
- 4, Other

How many of your horses are always or usually worked with a noseband?

The following images relate to the question below.

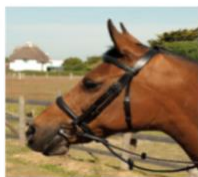

Plain  
Cavesson  
Noseband

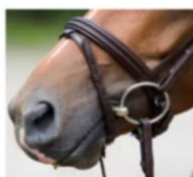

Hanoverian  
Noseband  
(With or without  
Flash)

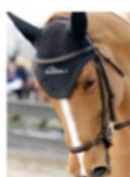

Drop  
Noseband

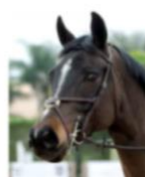

Figure-of-Eight/  
Grackle  
Noseband

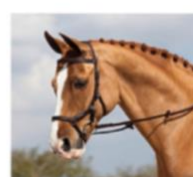

Micklem  
Noseband

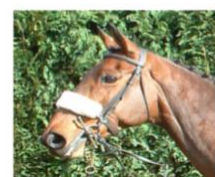

Sheepskin  
Noseband

Which of the pictures above most closely resembles the noseband you most commonly use?

- 1, Plain cavesson noseband

2, Hanoverian Noseband (with or without Flash)

3, Drop noseband

4, Figure-of-eight/Grackle noseband

5, Micklem noseband

6, Sheepskin noseband

7, Other

(Other) Please specify.

**Does the noseband have a tightening system like the images below**

1, Yes

2, No

3, Uncertain

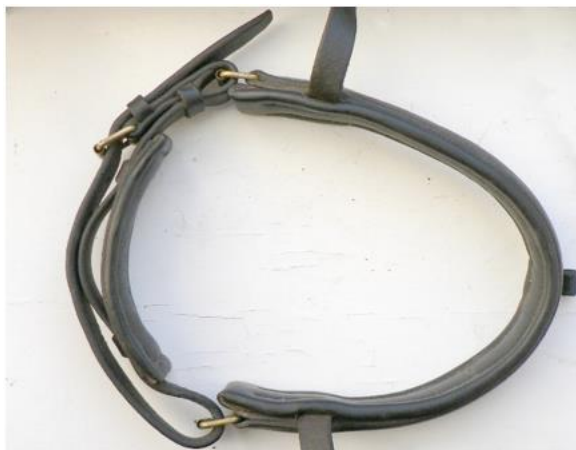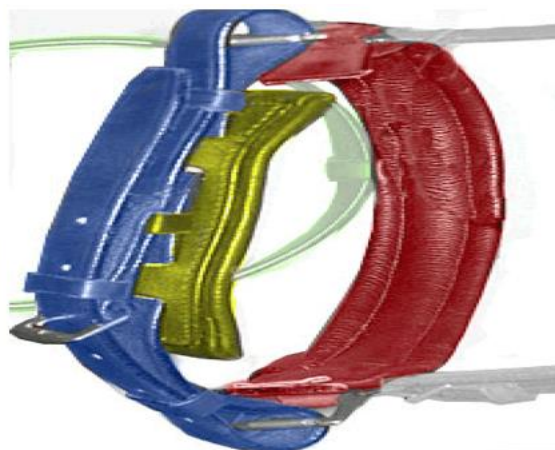

**Compared with training your horse at home, do you use tighter nosebands during competition/racing? (Tick the most appropriate response)**

1, Always

2, Usually

3, Sometimes

4, Rarely

5, Never

**Do you increase the tightness of nosebands after warm-up and immediately before competition? (Tick the most appropriate response)**

1, Always

- 2, Usually
- 3, Sometimes
- 4, Rarely
- 5, Never

**Do you usually loosen your horse's noseband for certain activities? (Tick the most appropriate response)**

- 1, Always
- 2, Usually
- 3, Sometimes
- 4, Rarely
- 5, Never

**(If 1-4) Please specify the activities in which you loosen the noseband.**

**What are the most important reasons that underpin your decision to use nosebands?  
Please rank up to 5 options that underpin your decision to use nosebands.**

- 1, (a) To improve the rider's/driver's ability to decelerate the horse
- 2, (b) To improve the rider's/driver's ability to steer the horse
- 3, (c) To improve the rider's/driver's ability to put the horse on the bit or in a frame/outline
- 4, (d) To prevent or reduce airway obstruction
- 5, (e) To prevent or reduce airway noise
- 6, (f) To improve performance in competition
- 7, (g) To prevent the horse moving its tongue over the bit
- 8, (h) To improve the horse's acceptance of the bit/contact
- 9, (i) To improve the appearance of the horse
- 10, (j) To prevent the horse opening its mouth
- 11, (k) To prevent the horse crossing its jaws
- 12, (l) To prevent the bit sliding through the horse's mouth
- 13, (m) To align with the rules of the sport
- 14, (n) The current noseband came with the bridle when I purchased it

15, (o) My instructor/coach/friend told me I needed to use one

16, (p) A veterinarian told me that I needed to use one

17, (q) Most people in my sport use them

18, (r) Other

**(Other) Please describe why you use a noseband.**

**How effective is the type of noseband you use at improving the rider's/driver's ability to decelerate the horse?**

**How effective is the type of noseband you use at improving the rider's/driver's ability to steer the horse?**

**How effective is the type of noseband you use at improving the rider's/driver's ability to put the horse on the bit or in a frame/outline?**

**How effective is the type of noseband you use at preventing or reducing airway obstruction?**

**How effective is the type of noseband you use at preventing or reducing airway noise?**

**How effective is the type of noseband you use at improving competition performance?**

**How effective is the type of noseband you use at preventing the horse from moving its tongue over the bit?**

**How effective is the type of noseband you use at improving your horse's acceptance of the bit/contact?**

**How effective is the type of noseband you use at improving the appearance of the horse?**

**How effective is the type of noseband you use at preventing the horse from opening its mouth?**

**How effective is the type of noseband you use at preventing the horse from crossing its jaws?**

**How effective is the type of noseband you use at preventing the bit from sliding through the horse's mouth?**

**(These questions were answered from a range of:**

1, Extremely effective

2, Very effective

3, Effective

4, Somewhat effective

5, Not at all effective)

**How long would you usually leave a noseband on a horse during ridden work? Please give your answer in minutes.**

**Have you seen any of the following complications, in your current or previous horses, either immediately or some time after using a noseband? (Tick all that apply)**

1, Hair loss in the area under the noseband

2, Soreness in the area under the noseband

3, Swelling of the area under the noseband

4, Discolouration of the area under the noseband

5, Bleeding from the mouth

6, Lip injuries

7, Reduced appetite

8, Dropping food

9, Behavioural signs of anxiety / distress

10, Head shyness

11, Difficulty bridling the horse

12, Difficulty fastening the noseband

13, Other

**(Other) Please specify any other complications.**

**Do you check the tightness of nosebands? (Tick the most appropriate response)**

1, Always

2, Usually

3, Sometimes

4, Rarely

5, Never

**Do you test for tightness by checking the space between the noseband and the skin? (Tick the most appropriate response)**

- 1, Always
- 2, Usually
- 3, Sometimes
- 4, Rarely
- 5, Never

**Where on the horse's head would you usually check the tightness of the noseband?**

- 1, At the bridge of the nose
- 2, Along the right or left cheek
- 3, Under the chin
- 4, Other

(Other) please specify.

**Which of the following would you consider sufficient space under the noseband?**

- 1, 0 fingers can be inserted under the noseband
- 2, 1 finger can be inserted under the noseband
- 3, 2 fingers can be inserted under the noseband
- 4, More than 2 fingers can be inserted under the noseband

**Do you ever use a taper gauge (like the one illustrated below) to check noseband tightness?**

- 1, Yes, I have used taper gauges and find them useful
- 2, Yes, I have used taper gauges and do not find them useful
- 3, No, I have never used a taper gauge

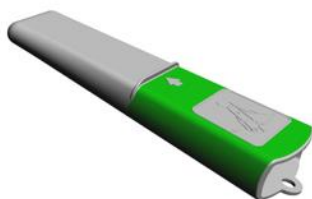



**What is your current country of residence**

- 1, Antigua and Barbuda
- 2, Australia
- 3, The Bahamas
- 4, Barbados
- 5, Belize
- 6, Canada\*
- 7, Dominica
- 8, Grenada
- 9, Guyana
- 10, Ireland
- 11, Jamaica
- 12, New Zealand
- 13, St Kitts and Nevis
- 14, St Lucia
- 15, St Vincent and the Grenadines
- 16, Trinidad and Tobago
- 17, United Kingdom
- 18, United States of America
- 20, Sweden
- 19, Other

**(Other) Please specify.**

**(If Australia) What state do you live in?**

- 1, New South Wales
- 2, Victoria
- 3, Queensland
- 4, Western Australia
- 5, South Australia
- 6, ACT
- 7, Tasmania
- 8, Northern Territory

**What age group do you fall into?**

- 1, 18-25
- 2, 25-35
- 3, 36-45
- 4, 46-55
- 5, 56-65
- 6, 66-75
- 7, 76-85
- 8, 86-95
- 9, 96+

**What is your gender?**

- 1, Male
- 2, Female
- 3, Other

**How many years have you worked with horses?**

- 1, 0-5
- 2, 6-10
- 3, 11-15
- 4, 16-20
- 5, 21-25
- 6, 26-30
- 7, 31-35
- 8, 36-40
- 9, 41-45
- 10, 46-50
- 11, 51-55
